# Supplementary material for: Temperature effects in articular cartilage biomechanics
Source: Oxford University Press journal article supplement (doi:10.1242/jeb.042960), 2010-10-29
Supplement: jeb042960figs4.pdf [file jeb042960figs4.pdf]

Type\_Alpha\_1 Isoform 1/1-1427 1 . . . . . TVL CDD I I CEDMKDCLSPETPFQEGCPII S ADLPTASGGPFGH KEGPDIKDI VQPGF GP GF AFG EG RR R D K E K K A P P R R D G E F G 68  
Type\_Alpha\_1 Isoform 2/1-1418 1 . . . . . M I R L G P Q I L L T L V A A V L R G G . . . . . Q D V R G P G P G H K E G P D I K D I V E R G P G P F A G E C Q P R R R K E K K A P P R R D G E F G 69  
Type\_Alpha\_1/1-1403 1 G C V D N G N V L C D D V I D E L K D C C N A K V P T D E C C P V P E . . . . . G E L . . . . . S R T D E I T T V E G P G K D T R P R P P P A C P P E R D D I R Q D 78  
Type\_Alpha\_2/1-1304  
Type\_Alpha\_1 Isoform 1/1-1427 99 G N P G P P P P P P P P G L G G F A A I M A G F D E K A G A Q M G V M G P M G M P G P P F G A G A P G P G F G N G P E G E P G V G F M P G P P P P F G P D D G E A G K P G 202  
Type\_Alpha\_1 Isoform 2/1-1418 90 G N P G P P P P P P P P G L G G F A A I M A G F D E K A G A Q M G V M G P M G M P G P P F G A G A P G P G F G N G P E G E P G V G F M P G P P P P F G P D D G E A G K P G 193  
Type\_Alpha\_1/1-1403 79 S L R P D P P P P P P P P P G L G G F A L L S Y R D E K A G A Q M G V M G P M G M P G P P F G A G A P G P G F G N G P E G E P G V G F M P G P P P P F G P D D G E A G K P G 179  
Type\_Alpha\_2/1-1304 1 . . . . . P P P P P P P P P P G L G G F A A . . . . . F D A G . . . . . G P F M G M G P P P A S A P G P P G F G P P G P E P G P G T G A A R P P P P P A A E G H P G P P R 90  
Type\_Alpha\_1 Isoform 1/1-1427 203 S E R G P P P P G A R G F P G P L P G V I W R G Y P G L D A K E A G A P V G E S G P P E N G S P G M P R G L P G E R G T P A G A A A R G D G G P S P A G P P P P P G A G P 306  
Type\_Alpha\_1 Isoform 2/1-1418 184 S E R G P P P P G A R G E P T G P L P G V I W R G Y P G L D A K E A G A P V G E S G P P E N G S P G M P R G L P G E R G T P A G A A A R G D G G P S P A G P P P P P G A G P 207  
Type\_Alpha\_1/1-1403 100 P E R G P P P P G A R G L P G T A B L P G M V I H R G F S L D L A K E A G A P P G E P P E N G A P G M G P R G L P G E R G P G A P A A R G D G A T A A A G P P P T P A G P P 283  
Type\_Alpha\_2/1-1304 91 P E R G V V P P G A G T P G L P G F G I R H N G L D L K P G P A P V G E S P A G E N G T P G T A R G L P G E R G V A P P A A A R G S G V S V V R A G I S A G P P G 194  
Type\_Alpha\_1 Isoform 1/1-1427 307 P F A P A K E G A G T A A R C P E A G P R C E P T P G P P P A G A A G P G T D G P A K S A G A P I A G A P F P G P P P P P P G P G P G T G S L P K Q T G E P F A G F G E Q E P 414  
Type\_Alpha\_1 Isoform 2/1-1418 296 P F A P A K E G A G T A A R C P E A G P R C E P T P G P P P A G A A G P G T D G P A K S A G A P I A G A P F P G P P P P P P G P G P G T G S L P K Q T G E P F A G F G E Q E P 401  
Type\_Alpha\_1/1-1403 208 P F G A V A K E G G G P P R G S E G P G V L R G E P P P P A G A A G P N G P A G D G Q P A G A G A N G A R I A G A P F G A R G P S P G P S P G P P G P G K N S G E P A G S K D T A K 387  
Type\_Alpha\_2/1-1304 105 P G A P P K E L G E R N P P A G P A P G V L E G L S R V P P P P N A N G L P G A G A G L P G V A G A P L P P P R I P G R V A A G A T A R L V G E P P A G S G E S E N 218  
Type\_Alpha\_1 Isoform 1/1-1427 411 E G P G P P P A P P A P P A E E G K R A G E P C A G P A P P P G E A P N I R P Q D C L A G P A P P E R P S L A P P A G A P P P P P P L P A A R L T P R P D A P P R 504  
Type\_Alpha\_1 Isoform 2/1-1418 402 E G P G P P P A P P A P P A E E G K R A G E P C A G P A P P P G E A P N I R P Q D C L A G P A P P E R P S L A P P A G A P P P P P P L P A A R L T P R P D A P P R 495  
Type\_Alpha\_1/1-1403 388 G E P F T I L I G P P P A E E G K R A G E P C A G P A P P P G P P P G P P S G L P A D G V A G P P A G E R A P P A G P S P R E A G R P E A L P G A K L T P R S P S P P D K 501  
Type\_Alpha\_2/1-1304 296 E E R A V G P G P P P P S E E G L R S T G E I P A S P P P P L R G N G S G L P A D G R A G V M P A S S R A T P A P V R P P G D S G P P E P Q L M G P P F P S P G N I S P A G 402  
Type\_Alpha\_1 Isoform 1/1-1427 515 V P S S A P E D O R P P P P G A R G I G V M G T P P G N A N E P P A G E K L P G A P L R L P Q D G E T A A G P P P A P A G E R G E G A P P P P L P G P P P P P P E G G 618  
Type\_Alpha\_1 Isoform 2/1-1418 402 T P P P A D O P P P P P P P A R G I G V M G T P P G N A N E P P A G E K L P G A P L R L P Q D G E T A A G P P P A P A G E R G E G A P P P P L P G P P P P P P E G G 595  
Type\_Alpha\_1/1-1403 403 E B R V L R L D R P P R I G A B A R G E R N I N I P P P A P S D P K A E K H A G L A R A R A P P D N N N A G P P P L Q V G O G K E G P A G P P F Q L P D G A T A E A G 506  
Type\_Alpha\_1 Isoform 1/1-1427 619 P G D D V P G E A G A P L V G P R E R F G E R G P S S Q L G A R L P P T P G T P G P A A G P A P P P A A G P P L D M P P E R A A G I A G P K D R D V E K G P E G A P D 722  
Type\_Alpha\_1 Isoform 2/1-1418 607 P G D D V P G E A G A P L V G P R E R F G E R G P S S Q L G A R L P P T P G T P G P A A G P A P P P A A G P P P L D M P P E R A A G I A G P K D R D V E K G P E G A P D 713  
Type\_Alpha\_1/1-1403 596 P G E V P G D L A G P P S A R G E R F G E R G P P P P P A G P A N G A P N D G A G A P A P S G A G L P G P P P P A G P P P A G I L P G K E R A G P A G D A P D 690  
Type\_Alpha\_2/1-1304 402 P G E R I R P E L R A P P A R G E R P G S S A A B P T P I S S E P S P R P G N G E P R V V A R G T A P S P S I B E R A A G I P G K E R A G T E L R D I S B R D 810  
Type\_Alpha\_1 Isoform 1/1-1427 723 G O R L T P I G P P P A G A N G K E V G P P P A T A G A R A P E R G E T P P P A G F A P P D A G P G A K E G E A Q K D A G A P P P P S G A P P P P T G V T P P K A 826  
Type\_Alpha\_1 Isoform 2/1-1418 714 G O R L T P I G P P P A G A N G K E V G P P P A T A G A R A P E R G E T P P P A G F A P P G A D G P A K E G E A Q K D A G A P P P P S G A P P P P T G V T P P K A 817  
Type\_Alpha\_1/1-1403 700 V Y G L T P I G P P P A G A N G K E O A G S P A P T T A R A N G A P D R E P P P P A G F A P P A D G P A K E G P D A A K A D A G P P P A P A P P I N V G A P P A G 803  
Type\_Alpha\_2/1-1304 611 G A E A P G I A G P P A G A N D R E A G A A G P A P P P S E G E V R G A F N G A A A G P A K E G E R G T K P R P E N V P G T P R V G A P P S I N P P P P A G S 714  
Type\_Alpha\_1 Isoform 1/1-1427 827 R Q A G P P G A T P G A A A G V P P P G N P P P P P P P S D D P G A R O S S P P R A D P L Q G P A P P P E G E P D D G R S S P P P P P L A G R G I V L P G R 930  
Type\_Alpha\_1 Isoform 2/1-1418 818 R Q A G P P G A T P G A A A G V P P P S N G P P P P P P P S D D P G P A R O S S P P R A D P L Q G P A P P P E G E P D D G R S S P P P P P L A G R G I V L P G R 921  
Type\_Alpha\_1/1-1403 804 R S A G P P G A T P G A A A G V P P P S N A G P P P P P A G E S D P P R G E T A R P A R P E V P P P P P A G E A G P A G A R A P P T P P G I A G R V V L P G R 907  
Type\_Alpha\_2/1-1304 715 R D G P P P A T P G A A A G T P P P P S G I S P P P P P P A G E L R P P D O G E V S E T G A S P P P V G L E P S P E P T A S P P P T P G P L L G A P F L B L P G S 818  
Type\_Alpha\_1 Isoform 1/1-1427 931 E R P P P L P P P P E R P Q A P P A R D R P P P V P P L T R A P E P R E S S P A D P P P D A A V R D R G E T G A V A P A P P P P P P P A P P R I R D R D R E A A Q 1034  
Type\_Alpha\_1 Isoform 2/1-1418 922 E R P P P P P P P P P E R Q A P P A S D R P P P P V P P L T R A P E P R E S S P A D P P P D A A V R D R G E T G A V A P A P P P P P P P A P P R I R D R D R E A A Q 1025  
Type\_Alpha\_1/1-1403 908 E R P P L P P P P P P P P P P P P P P P P P P L A G R P E S R E R G A P A E R S P D D Q S P A A D R G E T G A P P P P A P A P A P A P P V P V A G S H N R E T P A 1011  
Type\_Alpha\_2/1-1304 610 E R L R V V A S V G E R P S L I A G P P A R G P P V N G V N G V N A P E A E R D G P N D G P P D O Q P H G E R P P N A P V G A A P P G R V P V G S D R R E R P P A 922  
Type\_Alpha\_1 Isoform 1/1-1427 1035 P M P P A P A G A R M P P P P P D R P K G E T E A E R G L K G R F T G L L G L P P P P S D G A G P A P S P P P P P P V S S K D G A N G I P P I G P P P P R S E T P F 1138  
Type\_Alpha\_1 Isoform 2/1-1418 1026 P M P P A P A G A R M P P P P P D R P K G E T E A E R G L K G R F T G L L G L P P P P S D G A G P A P S P P P P P P V S S K D G A N G I P P I G P P P P R S E T P F 1129  
Type\_Alpha\_1/1-1403 923 G A V P P A G A V P P P P P P P R D K G E P D K P R G L P K H N G L L P G L A G H H G D C A P A V G R A S P P P A G R S E A G D R I P O G A V G A I R E G S O S P R 1020  
Type\_Alpha\_2/1-1304 1029 G A V P P A G A V P P P P P P P R D K G E P D K P R G L P K H N G L L P G L A G H H G D C A P A V G R A S P P P A G R S E A G D R I P O G A V G A I R E G S O S P R 1020  
Type\_Alpha\_1 Isoform 1/1-1427 1139 A G P P G N P G P P P P P P P P D I M S A F A G L R E P G P D L P M R A D E A A G . . N L R H D A E V D A T L K S L N G I E S L R P E G S R R N P A R T C D R L L C H P E W S G D W I 1240  
Type\_Alpha\_1 Isoform 2/1-1418 1130 A G P P G N P G P P P P P P P P D I M S A F A G L R E P G P D L P M R A D E A A G . . N L R H D A E V D A T L K S L N G I E S L R P E G S R R N P A R T C D R L L C H P E W S G D W I 1231  
Type\_Alpha\_1/1-1403 1116 A G P P P P P P P P P P P P P P G L L F L Q P P . E A H A H G L R Y A H D A N . . V V D R L E V D T L K S L N G I E N I R P E G S R R N P A R T C D R L M C H S D W S G E W I 1215  
Type\_Alpha\_2/1-1304 1027 A G P P P P P P P P P P P P P P G L L F L Q P P . E A H A H G L R Y A H D A N . . V V D R L E V D T L K S L N G I E N I R P E G S R R N P A R T C D R L L C H P E W S G E W I 1118  
Type\_Alpha\_1 Isoform 1/1-1427 1241 P N G O C T L A M V F O M E T G E C V Y V N P A S V P K N W S S S . . R D H I W F E T I N G G F H R S G D D N L A N T A N V M T F L L R L L E G S N I T Y H K N S I A M D E A 1343  
Type\_Alpha\_1 Isoform 2/1-1418 1232 P N G O C T L A M V F O M E T G E C V Y V N P A S V P K N W S S S . . R D H I W F E T I N G G F H R S G D D N L A N T A N V M T F L L R L L E G S N I T Y H K N S I A M D E A 1334  
Type\_Alpha\_1/1-1403 1012 S R A P I G V A S V G E R P S L I A G P P A R G P P V N G V N G V N A P E A E R D G P N D G P P D O Q P H G E R P P N A P V G A A P P G R V P V G S D R R E R P P A 1115  
Type\_Alpha\_2/1-1304 1119 P N G O C T M A I R V F D F S G E C I R A Q E D I L V G W Y . . R N S A R H W V E T I N G G T Q E I N V E G V T T K E M A T L A E M L A N H A S N I T Y H K N S I A M D E I 1220  
Type\_Alpha\_1 Isoform 1/1-1427 1344 A H K L K A L L I R G S N V E I R A E G S R F T Y V L K D G C T S I G W K W I L E R S G . . T R L P I I D A R L D V G A D E F E F G V D I G V C F L 1427  
Type\_Alpha\_1 Isoform 2/1-1418 1335 A H K L K A L L I R G S N V E I R A E G S R F T Y V L K D G C T S I G W K W I L E R S G . . T R L P I I D A R L D V G A D E F E F G V D I G V C F L 1418  
Type\_Alpha\_1/1-1403 1203 T O N L K A L L I R G S N E I R A E G S R F T Y V L K D G C T S I G W K W I L E R S G . . T R L P I I D A R L D V G A D E F E F G V D I G V C F L 1403  
Type\_Alpha\_2/1-1304 1221 T O N L K A V I L R G S N V L A E G S R F T Y V L V D G S K N E W O K T I L E K T N P S R L I I D A R L D I G G A D E I R L N I G E V O F K 1304
