# Supplementary figures and images for: Temperature effects in articular cartilage biomechanics
Source: Oxford University Press journal article supplement (doi:10.1242/jeb.042960), 2010-10-29

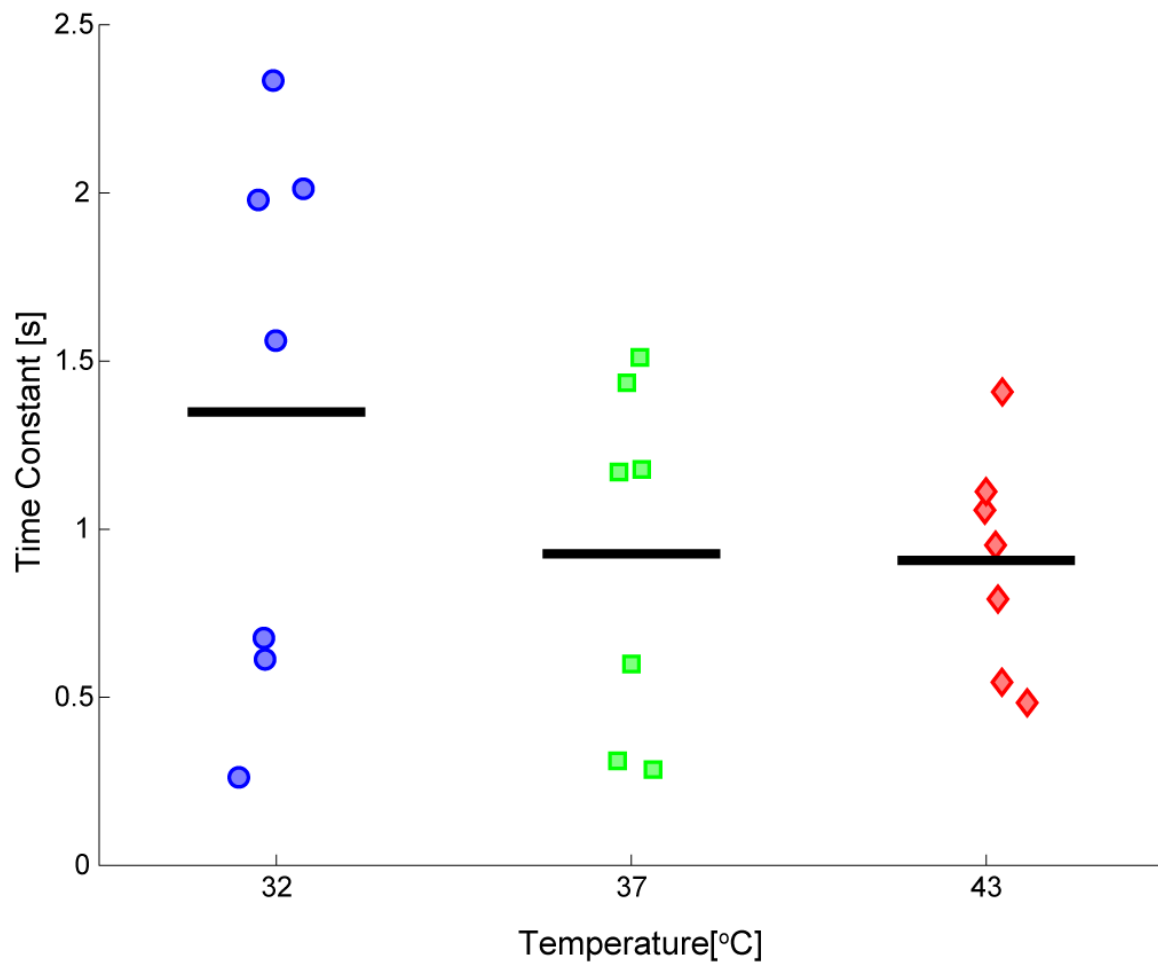

Supplement: jeb042960figs1.pdf [file jeb042960figs1.pdf]

A

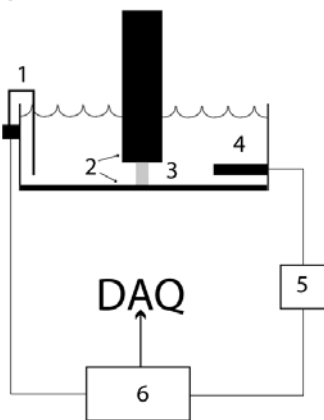

B

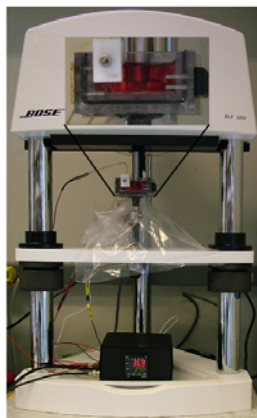

C

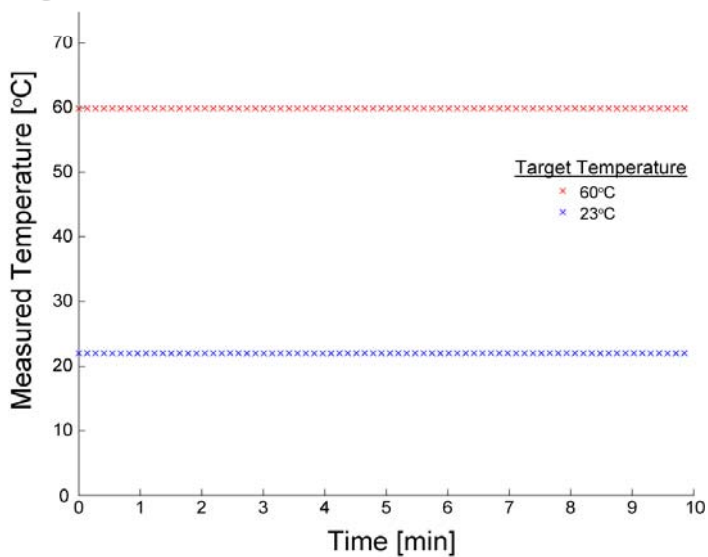

Supplement: jeb042960figs2.pdf [file jeb042960figs2.pdf]
